# Supplementary material
Source: MDPI journal article supplement (https://www.mdpi.com/2073-4352/8/1/13)
Supplement: s1 [file s1]

Supplementary data

|      |     |                                                               |      |
|------|-----|---------------------------------------------------------------|------|
| 6ETZ | 1   | MSVETPSALADSSPHTAPGSAGRSLELGAADIQDLESFEAGRGALPARAYLQSDAPRLSL  | 60   |
| 5EUV | 1   | -----                                                         | 0    |
| 6ETZ | 61  | NGEWQFRLSPGSRVAP--DDGQWLGEALNGFESLPVPSWPMHGHGAPAYTNVQFFFAVE   | 118  |
| 5EUV | 1   | -----MRVTQKLNHGWIIFAE-----GAADPA-----TPLAGE                   | 27   |
| 6ETZ | 119 | PPHVPEANPIGDHLVVE--AGPEFFPH-----ALLRFDGIESAGTVWLNQ            | 163  |
| 5EUV | 28  | TVTLPH-NAVDLPLSYFDETSYQRAFTYQRVIAWDDAWQGRVQLRFDGAMADNVVWVNG   | 86   |
| 6ETZ | 164 | VELGTTGRSRLAHE-----FDVSGILEQGENTLAVRV-----AQFSAASYV           | 202  |
| 5EUV | 87  | VQV-----VAHPDGYTPFVADLTDHLRPGDNLVTVRIDGSENPAIPFPGAQIDVLYTA    | 140  |
| 6ETZ | 203 | EDQDMWWLPGIFRDVTLQARPAAGIDDDVVFHAGYDHTGEGILKVEASRGGQAIDAVRV   | 263  |
| 5EUV | 141 | -----GIYRDVWLMVLPER-----HLTNARILTPDALSDAKTV--VIR-             | 175  |
| 6ETZ | 264 | PELAL-----ELAAG-----TEVVRVPAVEPWSAEVPKLY--EAAVSAAGES          | 302  |
| 5EUV | 176 | PEVTAPGPVRRARLLDGDREIAATEGEGELTLAGLTGLSLWS TDNPQLYTVELTLPSGDV | 235  |
| 6ETZ | 303 | VALQIGFRSIAIEDAQFKVNGRRILLRQVNRHEHHPRLGRVPRDVVEAELRLMKQHNI-   | 342  |
| 5EUV | 236 | TTHRFGRFTAEWTPQGFLLNGQPMKLRGLNRHQSWAHQGYAAGRHAQERDAEIVR-HDLC  | 295  |
| 6ETZ | 343 | -NAIRTSHPYPHPQFLALADQLGFYVLECDLETHGFESAGWAQNPSDDPQWEDALVDRM   | 397  |
| 5EUV | 296 | CNMVRTSHYPQSTWFLDRCDIEGL-LVFE-----EIPGWQH--IGDQAWQDRSDVNV     | 343  |
| 6ETZ | 398 | RRTVERDKNHASVVMWSLG-NEAGTGRNL-AAMSRWTKDRDPSRPIHYEGD---WSSEH   | 448  |
| 5EUV | 344 | RAMITRDWNHPSIVIWGVRLNESPDNHDIFYVRTNALARELDPTRAI---GGVRCITDSEM | 399  |
| 6ETZ | 449 | V-DVYSR--MYASQAETALIGQ---GIEPALNDAALDARRRAMPFVLCQEVHAMGNPGGG  | 528  |
| 5EUV | 400 | LEDVYTMNDFILDESELPLINRPTALRPTEEVGTI---KKPVPYLVTEY-----NGH     | 450  |
| 6ETZ | 529 | MSEYQALFEKYPRLMGGFVWEWLEHGI---TVSTADG-----VDHYGGDFG           | 573  |
| 5EUV | 451 | MFPTKA---QDPEL-----RQMEHVIRHLEVLNAAHGDPAISGCIWGMCFDYNTHKDFG   | 501  |
| 6ETZ | 574 | EEVHDGNFVT-DGLVDADRRPR-----PGLLDFKKVIEPLRIDVARDWTGFT          | 619  |
| 5EUV | 502 | A---GDRI CHHGVM DIWREPKFAAHAYGSQKPPSEGI-----VMEPVTF-----W---- | 543  |
| 6ETZ | 620 | LRNGQDFADTSAFSFRYEAVEADGGALDGGTVDVAPVAPQSETVVELPGSVAALAAGLSDG | 679  |
| 5EUV | 544 | -----ARGERNIGGVLPLIVLTCDEVEFECAG-----                         | 571  |
| 6ETZ | 680 | RPAVLTVRAVLGADSAWADAGHEVAVGQSVREPGAPVPPAPVEPVQVQDSELTLPVVF-   | 739  |
| 5EUV | 572 | -----VTRRVGPDRE-----RFPHLRPPVIIDHRHISAEELGQWGMWSH             | 610  |
| 6ETZ | 740 | -SRATGMPTSIGGVV-----EKLGLTLWVAPTDNDLGREWGADERPLATQWKDAGL      | 790  |
| 5EUV | 611 | PGRITGW---LNQEVALREYVADPLPTTLQIAP-DRD TLPADGDIDLRVMLRALDQVG-  | 666  |
| 6ETZ | 791 | NRL-----HTRLLGISANPGQDGGETLTVR-----TRVSAADKQYGLVD             | 830  |
| 5EUV | 667 | NRLPFLDAGIAVTVDGPARLIGPDLRMLQGGTGMMLRLTGDAGTIRITARHPQFPEAVA   | 726  |
| 6ETZ | 831 | YTWSTDGETVGLRTQVRRDGTWVNRGFEVEWARIGLEFVLGEETELVSWFGQPHQSYPD   | 890  |
| 5EUV | 727 | TV-----TVG-----                                               | 731  |
| 6ETZ | 891 | TGQGARAGWFSFLAKMDVEYVRPQECGARSRSAAALQLGGRTLEICGDPFALTVPYYS    | 950  |
| 5EUV | 732 | -----                                                         | 731  |
| 6ETZ | 951 | QDVLDAAAHRPDLKADGRTYLYVDHALRGVGTAAACGPGVLEQYRLKPRDADFILTLKQRS | 1010 |
| 5EUV | 732 | -----                                                         | 731  |

**Figure S1.** The sequence alignment of *Arth* $\beta$ DG and *Par* $\beta$ DG performed using EMBOSS Needle Pairwise Sequence Alignment. The sequence similarity is 35%, and identity only 17.6% with 47.3% gaps. Catalytic amino acids marked with red boxes.

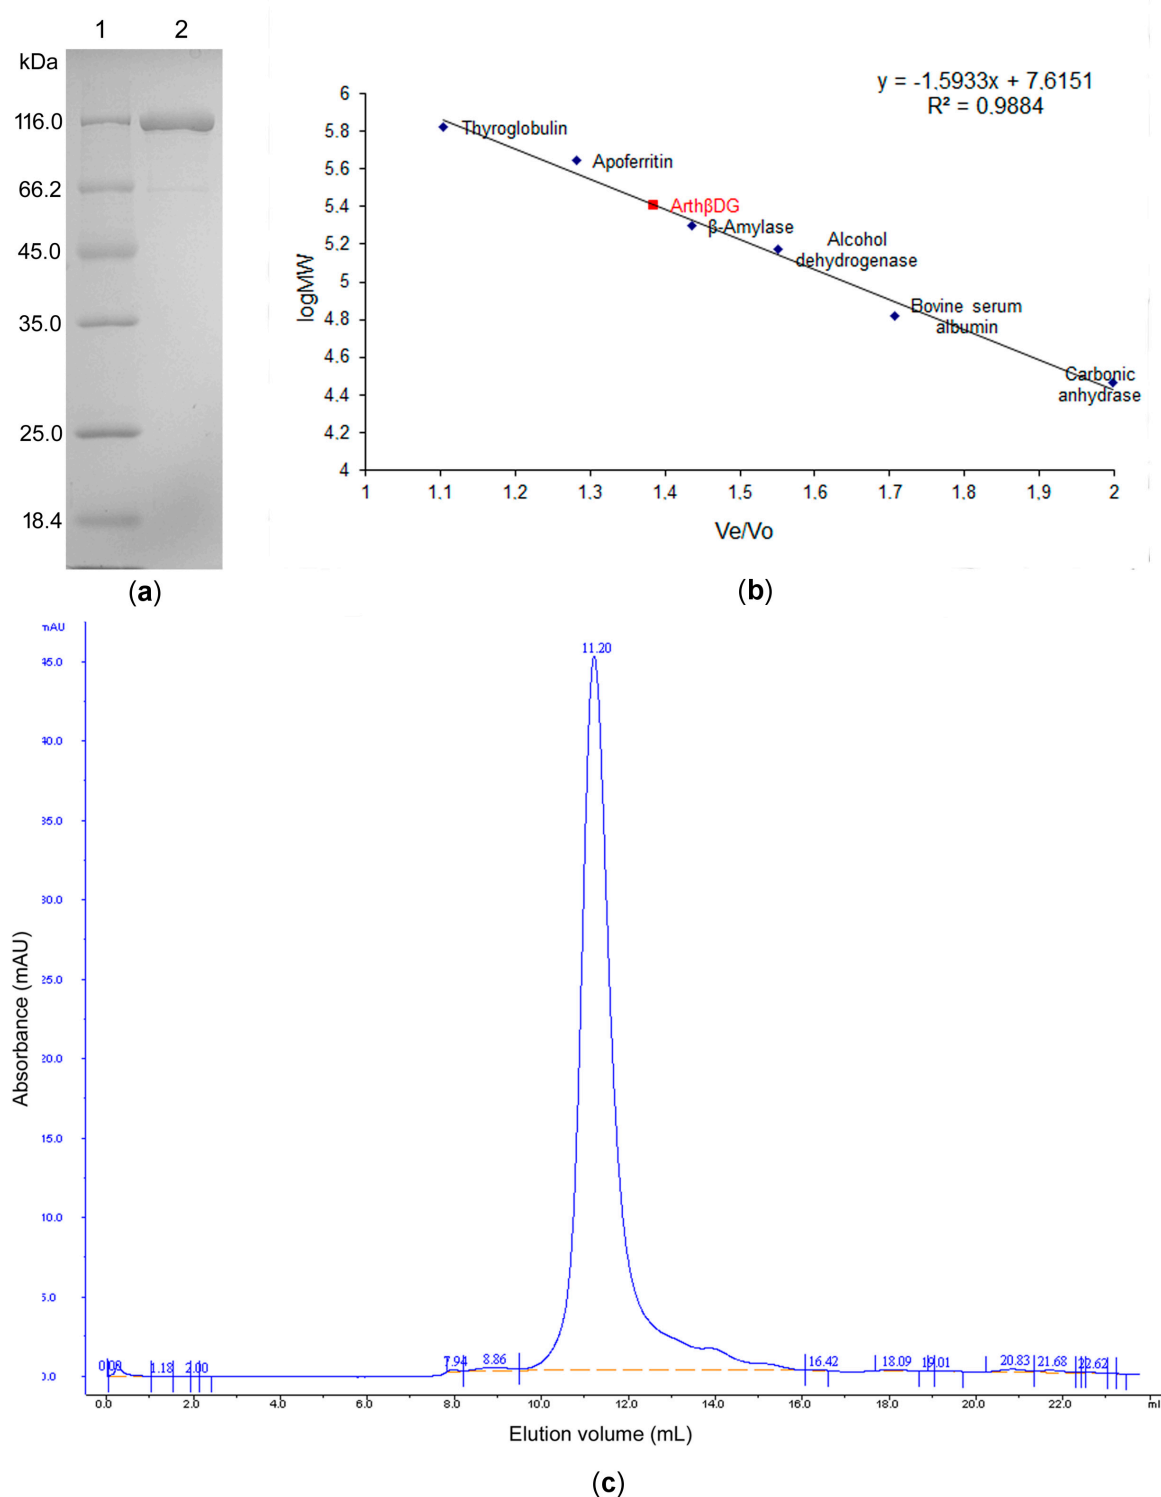

**Figure S2.** Biochemical oligomerization assays of *Arth*βDG. (a) SDS-PAGE analysis stained with Coomassie Brilliant Blue G; lane 1 protein molecular-weight markers (Thermo Fisher Scientific), lane 2 *Arth*βDG; (b)  $V_e/V_0$  versus log MW calibration curve for separation of proteins on a Superdex 200 10/200 GL column with *Arth*βDG marked red ( $V_e$ , elution volume;  $V_0$ , void volume); (c) chromatographic separation of the fraction containing active *Arth*βDG by gel filtration on a Superdex 200 10/300 GL column.
